# Supplementary material for: Methylation of avpr1a in the cortex of wild prairie voles: effects of CpG position and polymorphism
Source: PubMed Central journal article supplement (PMC5319330; doi:10.1098/rsos.160646), 2017-01-18

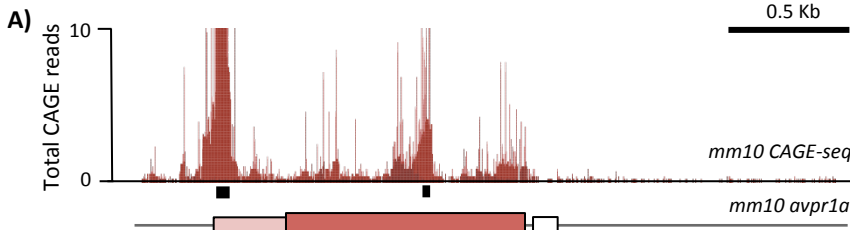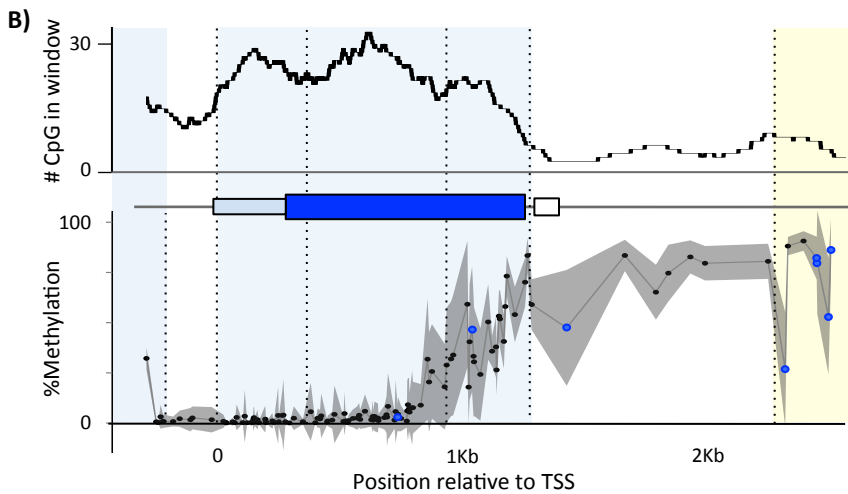

Supplement: rsos160646supp1.pdf [file rsos160646supp1.pdf]
